# Supplementary material for: Early safety indicators of COVID-19 convalescent plasma in 5000 patients
Source: JCI journal article supplement (doi:10.1172/jci140200), 2020-06-11
Supplement: sd1 [file 1]

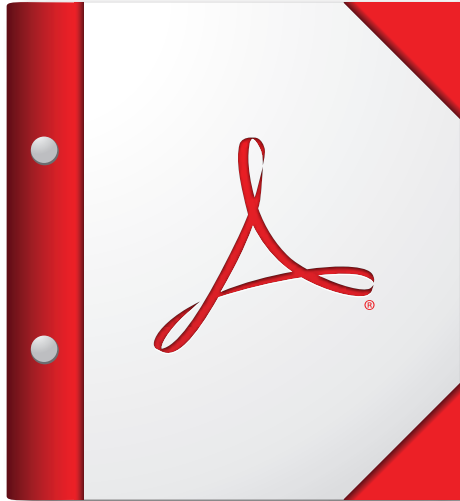

**For the best experience, open this PDF portfolio in  
Acrobat X or Adobe Reader X, or later.**

[Get Adobe Reader Now!](#)
